# Supplementary material for: Stabilizedβ-Catenin Ameliorates ALPS-Like Symptoms of B6/lprMice
Source: Hindawi journal article supplement (doi:10.1155/2017/3469108), 2017-01-01
Supplement: f1 [file 3469108.f1.pdf]

1. Supplementary table

Table S1. The sequence of primer for PCR.

| Name                     | Primer sequence               |
|--------------------------|-------------------------------|
| $\beta$ -catenin-Tg-K1   | 5'-GCCACAAGTTCAGCGTGTCC -3'   |
| $\beta$ -catenin-Tg-R-K2 | 5'-TCGTCCATGCCGAGAGTGA-3'     |
| FAS-C                    | 5'-GFAAATAATTGTGCTTCGTCAG -3' |
| FAS-K                    | 5'-TAGAAAGGTGCACGGGTGTG -3'   |
| FAS-W                    | 5'-CAAATCTAGGCATTAACAGTG -3'  |

2. Supplementary figure

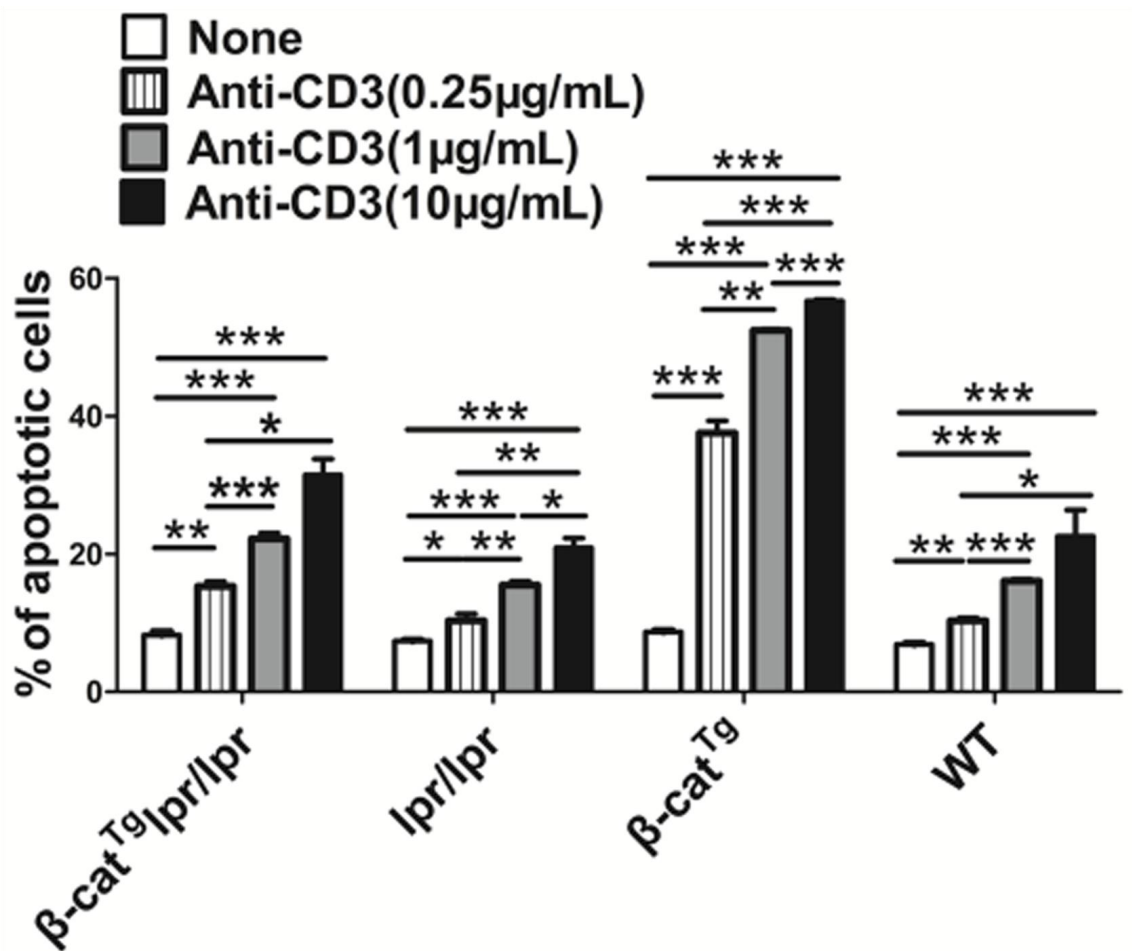

**Fig.S. Apoptosis was induced by anti-CD3 Ab in a dose-dependent manner.** All female mice splenic CD4+ T cells were expanded in IL-2, IL-7 and IL-15 for 5 days. The T cells apoptosis then was induced by using different concentrations of anti-CD3 Ab ( $\mu$ g/ml). Cell pellets were stained with anti-CD3-APC, annexin V and 7-AAD surface markers, then used the flow cytometric to analyze the apoptotic of T cells. Data are shown as the mean  $\pm$  SD(n=3).
